# Supplementary material for: Image integrity and standards
Source: PubMed Central journal article supplement (PMC7333887; doi:10.1098/rsob.200165), 2020-06-24
Supplement: rsob200165_review_history.pdf [file rsob200165_review_history.pdf]

## Open biology editorial on image integrity

Jon Pines

### Article citation details

*Open Biol.* **10**: 200165.  
<http://dx.doi.org/10.1098/rsob.200165>

### Review timeline

Original submission: 10 June 2020  
Final acceptance: 10 June 2020

Note: Reports are unedited and appear as submitted by the referee. The review history appears in chronological order.

## Review History

### Decision letter (RSOB-20-0165.R0)

10-Jun-2020

Dear Dr Pines

We are pleased to inform you that your manuscript entitled "Image Integrity and Standards" has been accepted by the Editor for publication in Open Biology.

You can expect to receive a proof of your article from our Production office in due course, please check your spam filter if you do not receive it within the next 10 working days. Please let us know if you are likely to be away from e-mail contact during this time.

Thank you for your fine contribution. On behalf of the Editors of Open Biology, we look forward to your continued contributions to the journal.

Sincerely,

The Open Biology Team  
mailto: [openbiology@royalsociety.org](mailto:openbiology@royalsociety.org)
